# Supplementary material
Source: PubMed Central journal article supplement (PMC6756979)

# Change of Authorship Form

(Must be completed and signed by ALL authors)

Please check all that apply

New author(s) have been added (in addition to this form, all new authors must complete the copyright transfer agreement and conflict of interest disclosure.

Change in order of authorship.

An author wishes to remove his/her name. An author's name may only be removed his/her own request and a letter signed by the author should accompany this form

Manuscript Number STROKE/2019/026566R2

Manuscript Title Acute Lateral Medullary Infarct due to Giant Cell Arteritis: A Case Study

## Former Authorship

Please list ALL AUTHORS in the same order as the original submission. For more than 12, use an extra sheet.

### Print Name

Name (1) Joseph Dardick  
Name (2) Charles Esenwa  
Name (3) Richard Zampolin  
Name (4) Berrin Ustun  
Name (5) Bibi Ayesha  
Name (6) ~~Kathryn Kirchoff-Torres~~ Ava L. Liberman

### Print Name

Name (7) ~~Ava L. Liberman~~  
Name (8) \_\_\_\_\_  
Name (9) \_\_\_\_\_  
Name (10) \_\_\_\_\_  
Name (11) \_\_\_\_\_  
Name (12) \_\_\_\_\_

## New Authorship

All authors must sign below agreeing to the changes in authorship. The authorship order must reflect the authorship order of the manuscript.

|                                         |                                    |                      |
|-----------------------------------------|------------------------------------|----------------------|
| Name (1) <u>Joseph Dardick</u>          | Signature <u>Joseph Dardick</u>    | Date <u>8/1/2019</u> |
| Name (2) <u>Charles Esenwa</u>          | Signature <u>[Signature]</u>       | Date <u>8/4/19</u>   |
| Name (3) <u>Richard Zampolin</u>        | Signature <u>[Signature]</u>       | Date <u>8/4/19</u>   |
| Name (4) <u>Berrin Ustun</u>            | Signature <u>Berrin Ustun</u>      | Date <u>8/6/19</u>   |
| Name (5) <u>Bibi Ayesha</u>             | Signature <u>[Signature]</u>       | Date <u>8/6/19</u>   |
| Name (6) <u>Kathryn Kirchoff-Torres</u> | Signature <u>K. Kirchoff, M.D.</u> | Date <u>8/1/19</u>   |
| Name (7) <u>Ava L. Liberman</u>         | Signature <u>Ava Liberman</u>      | Date <u>8/1/19</u>   |
| Name (8) _____                          | Signature _____                    | Date _____           |
| Name (9) _____                          | Signature _____                    | Date _____           |
| Name (10) _____                         | Signature _____                    | Date _____           |
| Name (11) _____                         | Signature _____                    | Date _____           |
| Name (12) _____                         | Signature _____                    | Date _____           |

Please scan and email to [stroke@strokeahajournal.org](mailto:stroke@strokeahajournal.org).

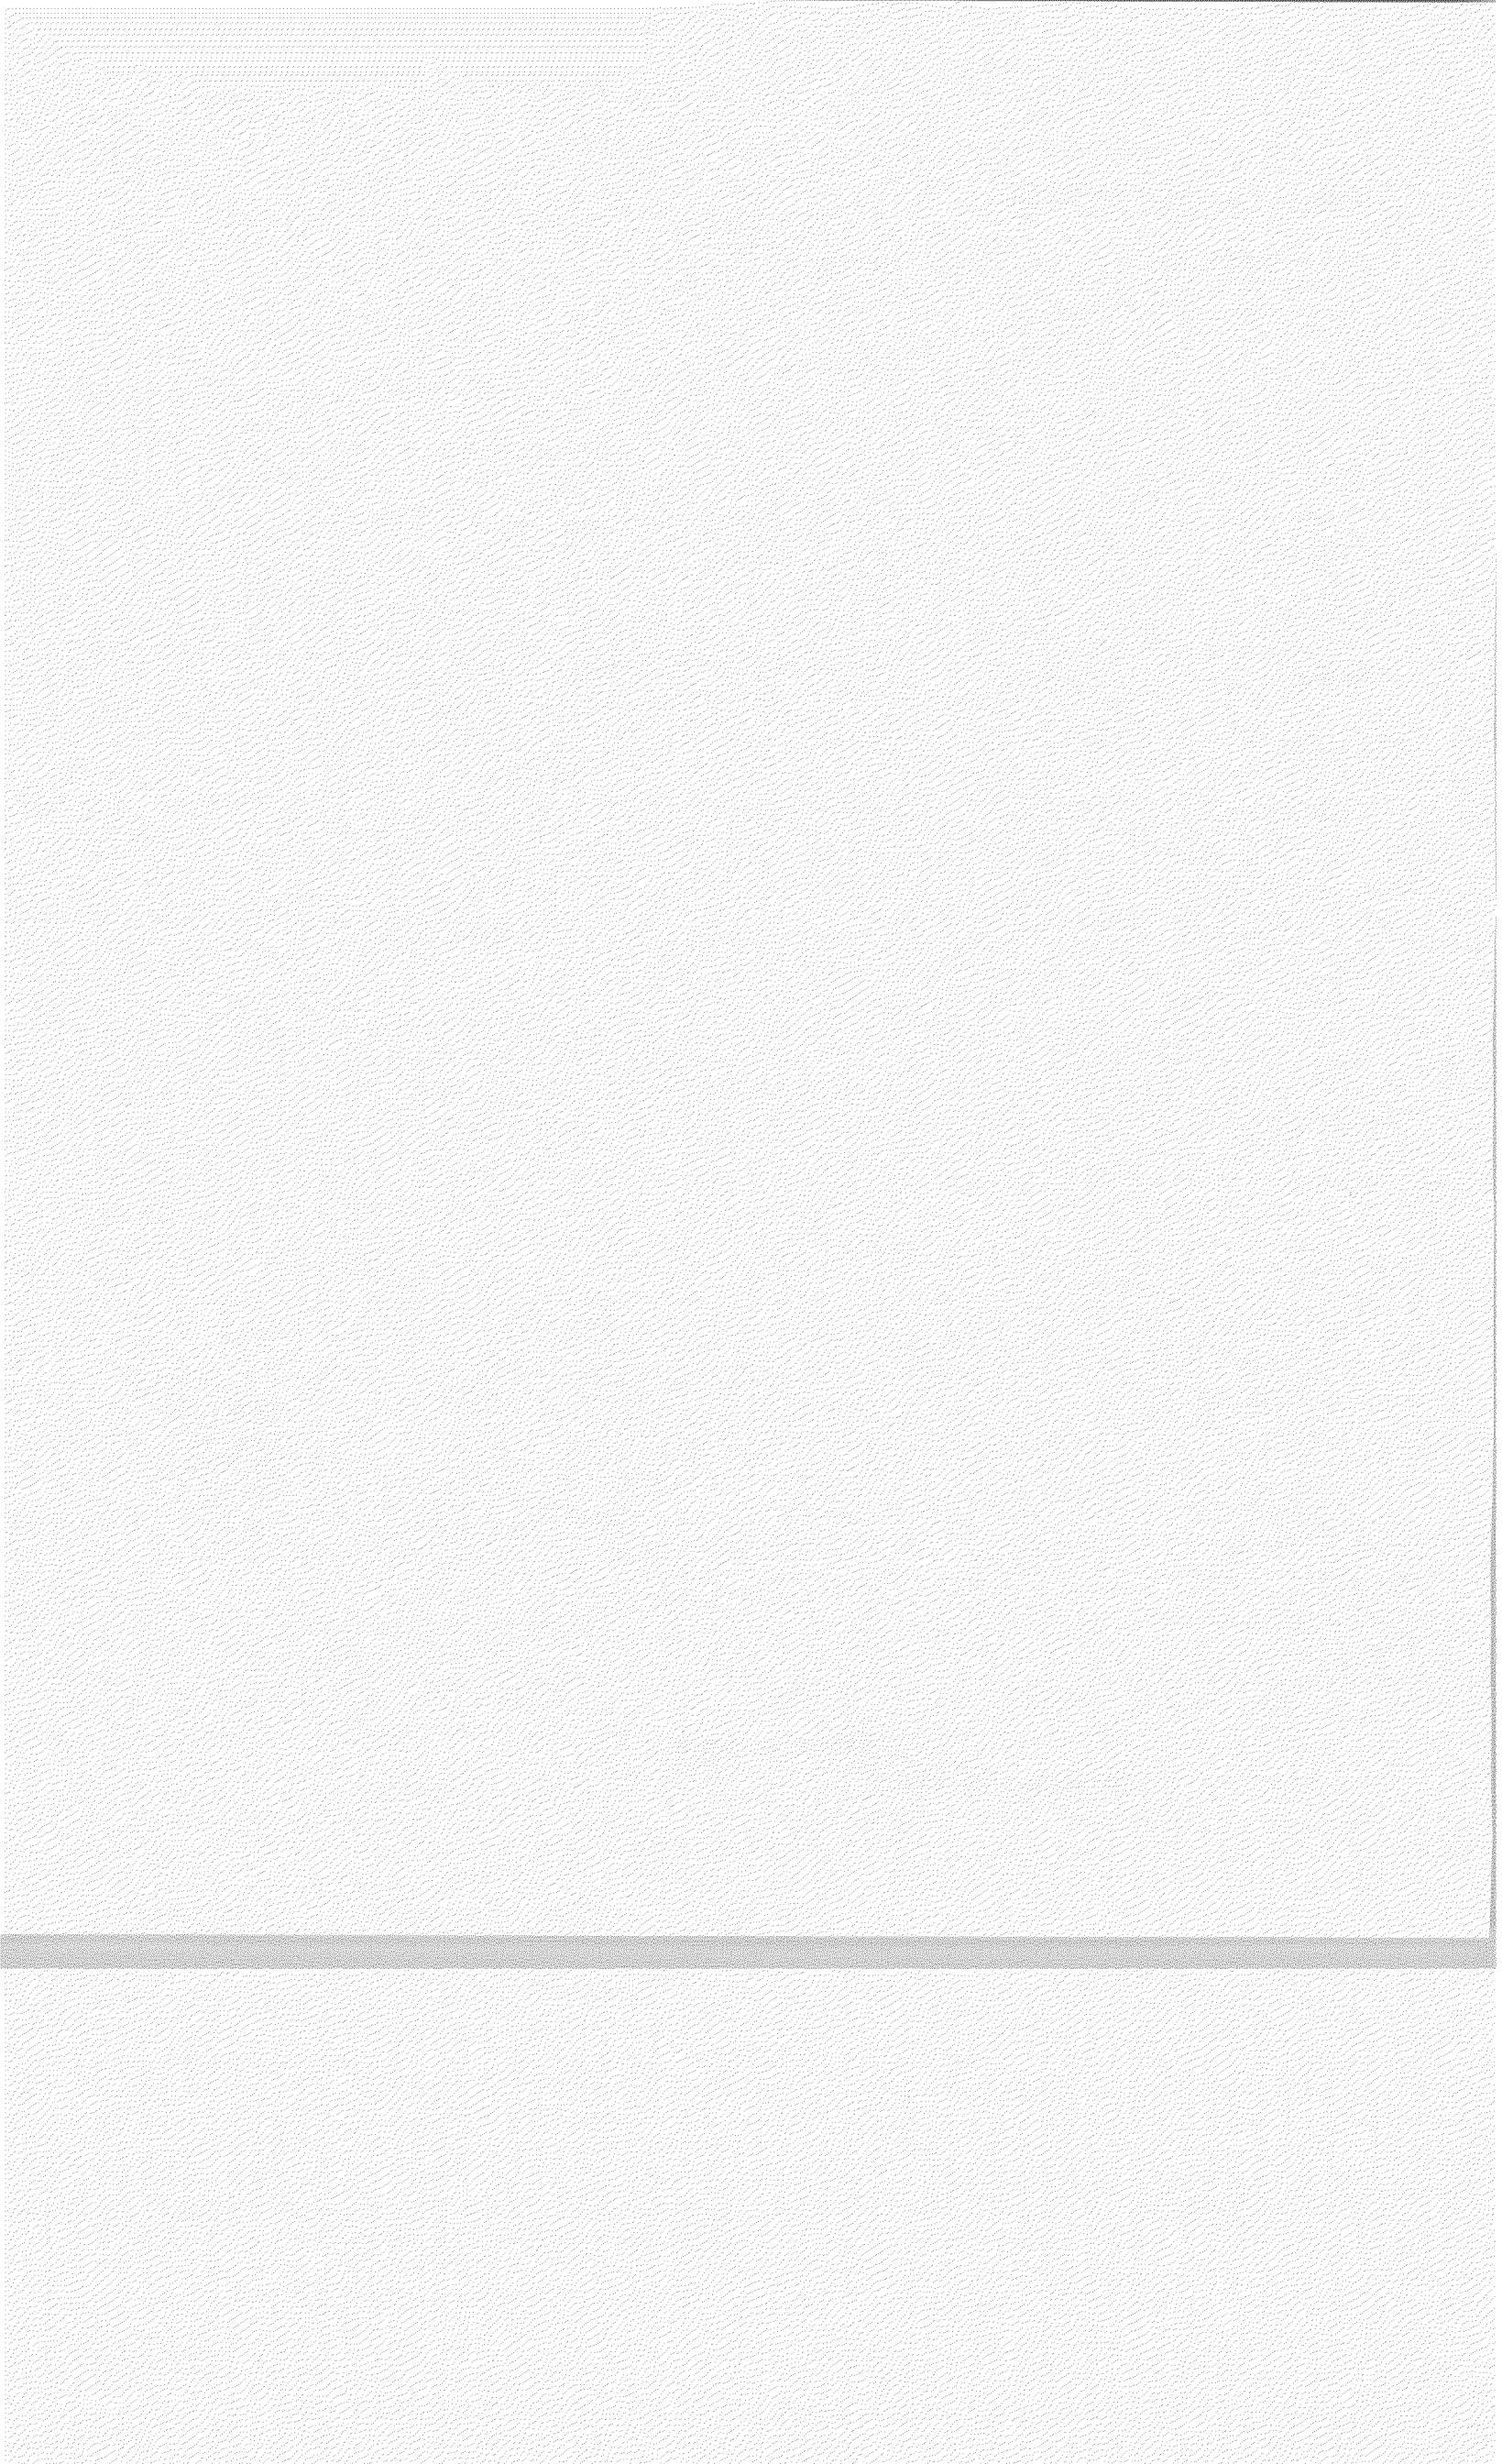

Supplement: NIHMS1537458-supplement-COA_form.pdf [file NIHMS1537458-supplement-COA_form.pdf]
